# Treatment of a genetic liver disease in mice through transient prime editor expression

## Authors:

Tanja Rothgangl<sup>1</sup>, Eleonora I. Ioannidi<sup>1</sup>, Yanik Weber<sup>1</sup>, András Tálás<sup>1</sup>, Desirée Böck<sup>1</sup>, Mai Matsushita<sup>2</sup>, Elina Andrea Villiger<sup>1</sup>, Lukas Schmidheini<sup>1,2</sup>, Jennifer Moon<sup>3</sup>, Paulo J.C. Lin<sup>3</sup>, Steven H.Y. Fan<sup>3</sup>, Kim F. Marquart<sup>1,2</sup>, Cornelia Schwerdel<sup>1</sup>, Nicole Rimann<sup>4</sup>, Erica Faccin<sup>4</sup>, Lukas Villiger<sup>1</sup>, Hiromi Muramatsu<sup>5</sup>, Máté Vadovics<sup>5</sup>, Alessio Cremonesi<sup>6</sup>, Beat Thöny<sup>4</sup>, Manfred Kopf<sup>2</sup>, Johannes Häberle<sup>4</sup>, Norbert Pardi<sup>5</sup>, Ying K. Tam<sup>3</sup>, Gerald Schwank<sup>1</sup>

## Affiliations:

<sup>1</sup>Institute of Pharmacology and Toxicology, University of Zurich, Zurich, Switzerland

<sup>2</sup>Institute of Molecular Health Sciences, ETH Zurich, Zurich, Switzerland

<sup>3</sup>Acuitas Therapeutics Inc., Vancouver, BC, Canada

<sup>4</sup>Division of Metabolism and Children's Research Center, University Children's Hospital Zurich, Zurich, Switzerland

<sup>5</sup>Department of Microbiology, Perelman School of Medicine, University of Pennsylvania, Philadelphia, PA, USA

<sup>6</sup>Division of Clinical Chemistry and Biochemistry, University Children's Hospital Zurich, University of Zurich, Zurich, Switzerland.

\*Correspondence to: Gerald Schwank ([gerald.schwank@uzh.ch](mailto:gerald.schwank@uzh.ch))

## One sentence summary:

*In vivo* prime editing in the adult mouse liver through transient prime editor expression lowers blood phenylalanine levels in a mouse model for Phenylketonuria.

30 **Abstract**

31 Prime editing is a versatile genome editing technology that does not rely on DNA double-strand  
32 break formation and homology-directed repair (HDR). This makes it a promising tool for  
33 correcting pathogenic mutations in tissues consisting predominantly of postmitotic cells, such  
34 as the liver. While recent studies have already demonstrated proof-of-concept for *in vivo* prime  
35 editing, the use of viral delivery vectors resulted in prolonged prime editor (PE) expression,  
36 posing challenges for clinical application. Here, we developed an *in vivo* prime editing  
37 approach where we delivered the pegRNA using self-complementary adeno-associated viral  
38 (scAAV) vectors and the prime editor using nucleoside-modified mRNA encapsulated in lipid  
39 nanoparticles (LNPs). This methodology led to transient expression of the PE for 48h and 26%  
40 editing at the *Dnmt1* locus using AAV doses of  $2.5 \times 10^{13}$  vector genomes (vg)/kg and a single  
41 dose of 3mg/kg mRNA-LNP. When targeting the pathogenic mutation in the *Pah<sup>enu2</sup>* mouse  
42 model of phenylketonuria (PKU), we achieved 4.3% gene correction using an AAV dose of  
43  $2.5 \times 10^{13}$  vg/kg and three doses of 2 mg/kg mRNA-LNP. Editing was specific to the liver and  
44 the intended locus, and was sufficient to reduce blood L-phenylalanine (Phe) levels from over  
45 1500  $\mu\text{mol/l}$  to below the therapeutic threshold of 600  $\mu\text{mol/l}$ . Our study demonstrates the  
46 feasibility of *in vivo* gene correction in the liver with transient PE expression, bringing prime  
47 editing closer to clinical application.

48

49 **Main Text:**

50

51 **Introduction**

52 Phenylketonuria (PKU) is an autosomal recessive metabolic liver disease caused by mutations  
53 in the phenylalanine hydroxylase (*PAH*) gene. While untreated PKU causes severe retardation,  
54 microcephaly and seizures, newborn screening followed by dietary L-phenylalanine (Phe)  
55 restriction and enzyme therapy leads to a life expectancy comparable to healthy individuals<sup>1-4</sup>.  
56 Nevertheless, despite existing treatments, learning disabilities and attention deficits remain  
57 frequent in PKU patients. In addition, the intricate dietary guidelines place a substantial burden  
58 on the quality of life. As a result, new treatment strategies attempting to permanently restore  
59 *PAH* expression in the liver are under exploration. Despite classical gene addition therapies,  
60 which provide an additional functional *PAH* gene copy to hepatocytes<sup>5</sup>, in the recent years  
61 there has been a growing interest in genome editing techniques that aim to directly repair  
62 pathogenic variants. The primary benefit of genome editing lies in the continuous expression  
63 of the corrected *PAH* allele, even as hepatocytes undergo cell division and genome replication.  
64 Hence, there is no need to express the genome editing tool over an extended period of time.

65 Employing the *Pah<sup>emu2</sup>* mouse model for human PKU, which contains a point mutation  
66 (c.835 T > C; p.F263S) that abolishes *PAH* function and results in Phe levels exceeding 1'500  
67  $\mu\text{mol/l}$ <sup>6,7</sup>, Richards et al. explored the feasibility of correcting this metabolic liver disease using  
68 CRISPR-Cas9 nucleases<sup>8</sup>. However, due to the low homology-directed repair (HDR)  
69 frequency in the liver only 1% of hepatocytes were corrected, which proved insufficient to  
70 resolve hyperphenylalaninemia. Circumventing the need for HDR, we and others have  
71 previously employed base editing to repair pathogenic PKU mutations at rates that led to  
72 therapeutic reduction of Phe levels<sup>9-13</sup>. Nonetheless, even though base editing holds promise  
73 for clinical use in PKU patients, the technology is largely limited to the correction of transition  
74 point mutations, excluding patients with different types of mutations.

75 Similar to base editing, prime editing allows precise correction of mutations without the need  
76 for HDR. Prime editors (PEs) consist of a H840A *SpCas9* nickase (nCas9) fused to an  
77 engineered M-MLV reverse transcriptase (RT) (hereafter referred as PE2)<sup>14</sup>. This complex is  
78 guided to the locus of interest by the prime editor guide RNA (pegRNA), which contains a RT  
79 template (RTT) and a primer binding site (PBS) fused to the 3' end of the guide RNA scaffold.  
80 nCas9-mediated nicking of the non-target DNA strand and hybridization of the PBS allows the

81 RT to elongate the 3' end using the RTT sequence as a template. Successful incorporation of  
82 the generated 3' flap into the locus results in the installation of the intended edit. This  
83 mechanism therefore permits the introduction of any small-sized genetic change.

84 Previous studies established proof-of-concept for *in vivo* prime editing in the liver<sup>15–17,18–20</sup>.  
85 However, these studies employed viral delivery vectors, which resulted in permanent PE  
86 expression. This could pose challenges for clinical applications, as prolonged PE expression  
87 elevates the likelihood of installing unintended off-target mutations and potentially triggers T  
88 cell mediated elimination of edited cells that continue to express the genome editor. In this  
89 study, we established an *in vivo* prime editing approach where the pegRNA is delivered using  
90 self-complementary adeno associated virus (scAAV) vectors and the PE is delivered as mRNA  
91 encapsulated in lipid nanoparticles (LNPs). Transient prime editor expression resulted in  
92 editing rates of 26% at the *Dnmt1* locus and 4.3% at the *Pah<sup>enu2</sup>* locus, leading to therapeutically  
93 relevant reduction of Phe levels.

94

## 95 **Results**

### 96 *Correction of the *Pah<sup>enu2</sup>* mutation using optimized PE components and AAV delivery*

97 In a previous study we attempted to correct the pathogenic mutation in the *Pah<sup>enu2</sup>* mouse model  
98 for PKU using AAV-mediated delivery of intein-split PE2 and a pegRNA targeting *Pah<sup>enu2</sup>*  
99 (mPKU-2.1)<sup>19</sup>. However, despite applying AAV doses of  $1 \times 10^{14}$  vector genomes (vg)/kg  
100 correction rates remained below 1%, and treatment was only successful when prime editing  
101 components were delivered from adenoviral (AdV) vectors at doses that are not viable in a  
102 clinical context. This prompted us to test if recent improvements in the prime editing  
103 technology could lead to an increase in correction rates of the *Pah<sup>enu2</sup>* mutation.

104 We exchanged PE2 with PEmax<sup>21</sup>, a prime editor variant with optimized codon usage and NLS-  
105 linker design, and incorporated pseudoknot structures to the 3' end of the pegRNA to protect  
106 them from exonuclease degradation (epgRNAs)<sup>22,23</sup>. Additionally, we modified the RTT  
107 sequence of the pegRNA to co-introduce a silent mutation in the GG sequence of the PAM,  
108 preventing retargeting of the locus once the edit is installed (**Fig. S1b**). Importantly, when  
109 transfected into HEK293T cells with the murine *Pah<sup>enu2</sup>* locus stably integrated (**Fig. S1a**), the  
110 adapted editing components led to substantially higher correction rates without inducing indel  
111 mutations above background (**Fig. 1a-c**).

112 Next, we assembled AAV vectors for *in vivo* delivery of the optimized PE components (PEmax  
113 + tevopreQ<sub>1</sub>-mPKU-SM) into *Pah<sup>enu2</sup>* mice. Since the size of the PE exceeds the packaging  
114 capacity of AAV, we and others have previously employed the intein-split system to express  
115 PE2 from two separate AAVs<sup>15,16,24</sup>. Here, we tested two intein-split designs for PEmax in  
116 HEK293T cells (1153/1154 and 713/714). While both variants showed comparable activity  
117 (**Fig. S1c**), we selected the 713/714 variant for our *in vivo* experiments as it facilitates the  
118 generation of AAV constructs that are more equal in size when the non-essential RNaseH  
119 domain of the RT is removed and the pegRNA is positioned on the vector containing the N-  
120 intein. The tevopreQ<sub>1</sub>-mPKU-SM pegRNA was cloned downstream of the human U6  
121 promoter, and N- and C-terminal fragments of PEmax were cloned between the liver-specific  
122 P3 promoter<sup>25</sup> and the 3' UTR, which contains the W3 post-transcriptional regulatory element<sup>26</sup>  
123 and the simian virus (SV40)-polyA tail (**Fig. 1d, S1d**). Recombinant AAV2 genomes were  
124 then packaged into hepatotropic AAV serotype 9 capsids (AAV2/9) and systemically  
125 administered to *Pah<sup>enu2</sup>* mice via the tail vein in a 1:1 ratio at a final dose of 1x10<sup>14</sup> vg/kg (**Fig.**  
126 **1e**). Analysis of isolated hepatocytes by next generation sequencing (NGS) after a period of 7  
127 weeks revealed 4.6% correction of the *Pah<sup>enu2</sup>* mutation (**Fig. 1f**), which resulted in a reduction  
128 of blood Phe levels from over 1500 μmol/L to 623.7 μmol/L (**Fig. 1g; S2a**). In line with  
129 previous genome editing studies that utilized AAV9 vectors in combination with the  
130 hepatocyte-specific P3 promoter<sup>7,25,27</sup>, we found that editing was largely limited to hepatocytes  
131 (**Fig. S2b**). Furthermore, we did not detect unintended editing in the liver of treated mice at the  
132 top 5 off-target binding sites of the mPKU-SM pegRNA, which were previously identified by  
133 CHANGE-seq<sup>19</sup> (**Fig. S2c,d**).  
134

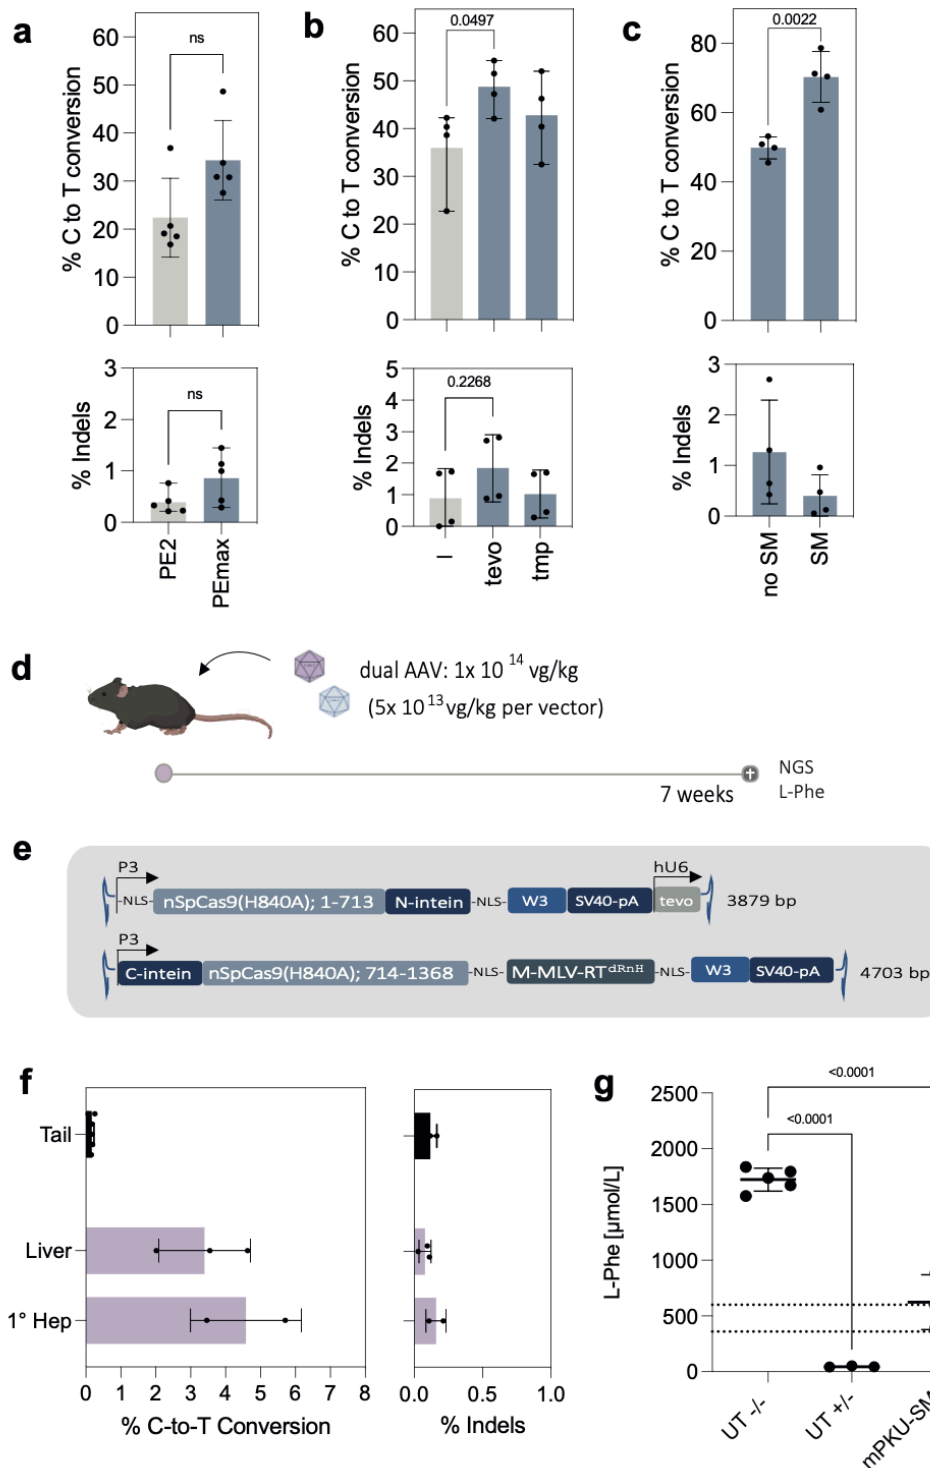

135

136 **Figure 1 | *In vivo* correction of *Pah<sup>enu2</sup>* mice using AAV-mediated delivery of intein-split PE. (a) C-to-T**

137 conversion rates (upper panel) and indel rates (lower panel) in HEK293T cells with the integrated *Pah<sup>enu2</sup>* locus,

138 transfected with PE2 vs. PEmax, or with (b) unmodified (gray) vs. tevopreQ<sub>1</sub> (tevo) modified vs. tmpknot (tmp)

139 modified pegRNAs (Suppl. Table 1), or with (c) tevopreQ<sub>1</sub>-mPKU-2.1 vs. tevopreQ<sub>1</sub>-mPKU-SM. Black

140 arrowheads indicate the site of the silent mismatch (SM) in the reverse transcriptase template (RTT). The part of

141 the RTT complementary to the PAM is highlighted in grey. Values represent mean +/- s.d. of four independent

142 biological replicates. Means were compared using an unpaired Student's t tests. (ns, not significant,  $P > 0.05$ ). (d)

143 Schematic illustration of the experimental outline. Adult *Pah<sup>enu2</sup>* mice were injected with the dual AAV system.

144 After 7 weeks blood was taken to analyze Phe levels, and whole liver lysates and isolated hepatocytes were  
145 analyzed by NGS to assess editing rates. (e) Schematic illustration of the AAV constructs selected for *in vivo*  
146 experiments. The tevopreQ<sub>1</sub>-mPKU-SM pegRNA was expressed from a hU6 promoter on the N-terminal vector.  
147 Indicated are AAV genome lengths including ITRs in base pairs (bp). (f) C-to-T conversion rates *in vivo* in PKU  
148 mice. Animals (n=3) were treated with an AAV dose of  $1 \times 10^{14}$  vg/kg ( $5 \times 10^{13}$  vg/kg per vector). Editing rates  
149 were assessed in lysed tail tissue (n=3), liver tissue (n=3) and isolated hepatocytes (n=3 and n=2). (g) Phe levels  
150 at the experimental endpoint of untreated homozygous *Pah<sup>enu2</sup>* animals (UT -/-), untreated heterozygous animals  
151 (UT +/-) and homozygous animals treated with prime editing. Dashed lines indicate recommended therapeutic  
152 thresholds for Phe levels in adults (600  $\mu$ mol/L) or in children/during pregnancy (360  $\mu$ mol/L)<sup>28,29</sup>. Values  
153 represent mean +/- s.e.m of independent biological replicates and were analyzed using an ordinary one-way  
154 ANOVA using Dunnett's multiple comparisons test. W3, truncated version of the posttranscriptional regulatory  
155 element of woodchuck hepatitis virus (WPRE); nSpCas9, nickase of *Streptococcus pyogenes* Cas9; tevo, trimmed  
156 engineered pegRNA; M-MLV-RT<sup>dRnH</sup>, M-MLV (Moloney Murine Leukemia Virus) Reverse Transcriptase (RT)-  
157 delta RnaseH; SV40-pA, Simian virus 40 poly-adenylation signal; NLS, nuclear localization signal. Unless  
158 otherwise stated, values depict mean +/- s.d. of independent biological replicates (ns, not significant, P > 0.05).

---

159

160

#### 161 *In vivo prime editing using LNP mediated pegRNA and PE mRNA delivery*

162 While *Pah<sup>enu2</sup>* correction rates with optimized PE components were substantially increased  
163 compared to our initial study<sup>22</sup>, they were not sufficient to reduce Phe levels below the  
164 therapeutic threshold for adult PKU patients (600  $\mu$ mol/L)<sup>28</sup>. In addition, recent clinical trials  
165 revealed that AAV doses of  $1 \times 10^{14}$  vg/kg could lead to severe immune reactions and, in rare  
166 incidents, have been associated with patient mortality<sup>30,31</sup>. Finally, AAV-mediated delivery  
167 leads to prolonged PE expression, which is not desired for genome editing as it could lead to  
168 an accumulation of off-target mutations and induce an immune response to the bacterial Cas9  
169 or the viral RT.

170 Previously, lipid nanoparticle (LNP)-mediated mRNA and sgRNA delivery has been employed  
171 for transient genome editing with Cas9 nucleases and base editors<sup>7,27,32-36</sup>. To assess if a similar  
172 approach is feasible for prime editing, we generated nucleoside-modified mRNAs<sup>37,38</sup> encoding  
173 for PE2 and PEmax and packaged them into LNPs. Confirming transient liver expression after  
174 systemic delivery of 2 mg/kg LNP-mRNA, we observed a peak in PE mRNA levels at 6 hours  
175 post injection (h.p.i.) and a peak in protein levels at 24 h.p.i., while at 45 h.p.i, neither PE  
176 mRNA nor PE protein levels were detectable anymore (**Fig. 2a,b; Fig. S3a,b**). Next, we  
177 chemically synthesized the tevopreQ<sub>1</sub>-mPKU-SM pegRNA targeting the *Pah<sup>enu2</sup>* locus, and a  
178 pegRNA that installs a G-to-C edit at the *Dnmt1* locus. This pegRNA has previously been  
179 successfully utilized for *in vivo* prime editing in the liver using AAV and AdV mediated

180 delivery<sup>19</sup>. To protect pegRNAs from exonucleases they were modified with 2'-O-methyl-3'-  
181 phosphorothioate (MS) at the 5' end and 2'-O-methyl-3'-phosphonoacetate (MP) at the 3'  
182 end<sup>39</sup>. In addition, we generated pegRNAs in which the RTT was substituted with deoxyribose  
183 nucleotides to further protect it from degradation by endonucleases (DNA-mod pegRNAs)  
184 (**Fig. 2c**). Confirming functionality of the synthesized pegRNAs, co-electroporation with  
185 PEmax mRNA into HEK reporter cells resulted in 25% editing at the *Pah<sup>emu2</sup>* site and 37%  
186 editing at the *Dnmt1* site using non-DNA modified pegRNAs, and 3% editing at the *Pah<sup>emu2</sup>*  
187 site and 21% editing at the *Dnmt1* site using DNA-modified pegRNAs (**Fig. 2d**). However,  
188 when administered into mice, using a repeated dosing scheme of 2 mg/kg LNP containing  
189 PEmax mRNA followed by 2 mg/kg LNP containing the respective pegRNA (to assure  
190 presence of PE protein when the pegRNA is delivered; **Fig. 2e**), editing rates remained below  
191 2% at the *Dnmt1* locus and 1% at the *Pah<sup>emu2</sup>* locus (**Fig. 2f**).

192





206 *in vivo* editing rates of homozygous (-/-) *Pah<sup>enu2</sup>* animals (left panel) and wildtype (WT) C57BL/6J animals (right  
207 panel). Unless otherwise stated, values represent mean +/- s.d. of independent biological replicates.

---

208

209

210 *In vivo correction of adult Pah<sup>enu2</sup> mice using AAV-pegRNA and LNP-mRNA delivery.*

211 We reasoned that the primary constraint for prime editing efficiency could be the abundance  
212 of functional pegRNA rather than the PE. Therefore, we also tested an alternative strategy,  
213 where only the PE mRNA is delivered via LNP and the pegRNA is delivered via AAV. PKU  
214 mice were first administered with  $2.5 \times 10^{13}$  vg/kg self-complementary AAV2/9 (scAAV2/9)  
215 encoding for the tevopreQ1-mPKU-SM pegRNA (**Fig S4a**), followed by treatment with PE2  
216 LNP-mRNA or PEmax LNP-mRNA at a dose of 3 mg/kg (**Fig 3a**). In addition, we injected  
217 wildtype mice with LNP-mRNA that were pre-treated with an scAAV2/9 encoding for the  
218 tevopreQ1-modified *Dnmt1* pegRNA (**Fig 3a**). While editing rates were relatively low at  
219 *Pah<sup>enu2</sup>* locus (1.1% with PE2 and 1.0% with PEmax) (**Fig. 3b**), at the *Dnmt1* locus we observed  
220 17.7% editing with PE2 and 26.2% editing with PEmax (**Fig. 3c**). Notably, editing rates were  
221 similar when the scAAV2/9 dose was decreased from  $2.5 \times 10^{13}$  vg/kg to  $1 \times 10^{12}$  vg/kg (20%  
222 vs. 26%; **Fig. 3d**), and when animals were analyzed 4 months after treatment instead of 1 week  
223 after treatment (**Fig. S4b**).

224

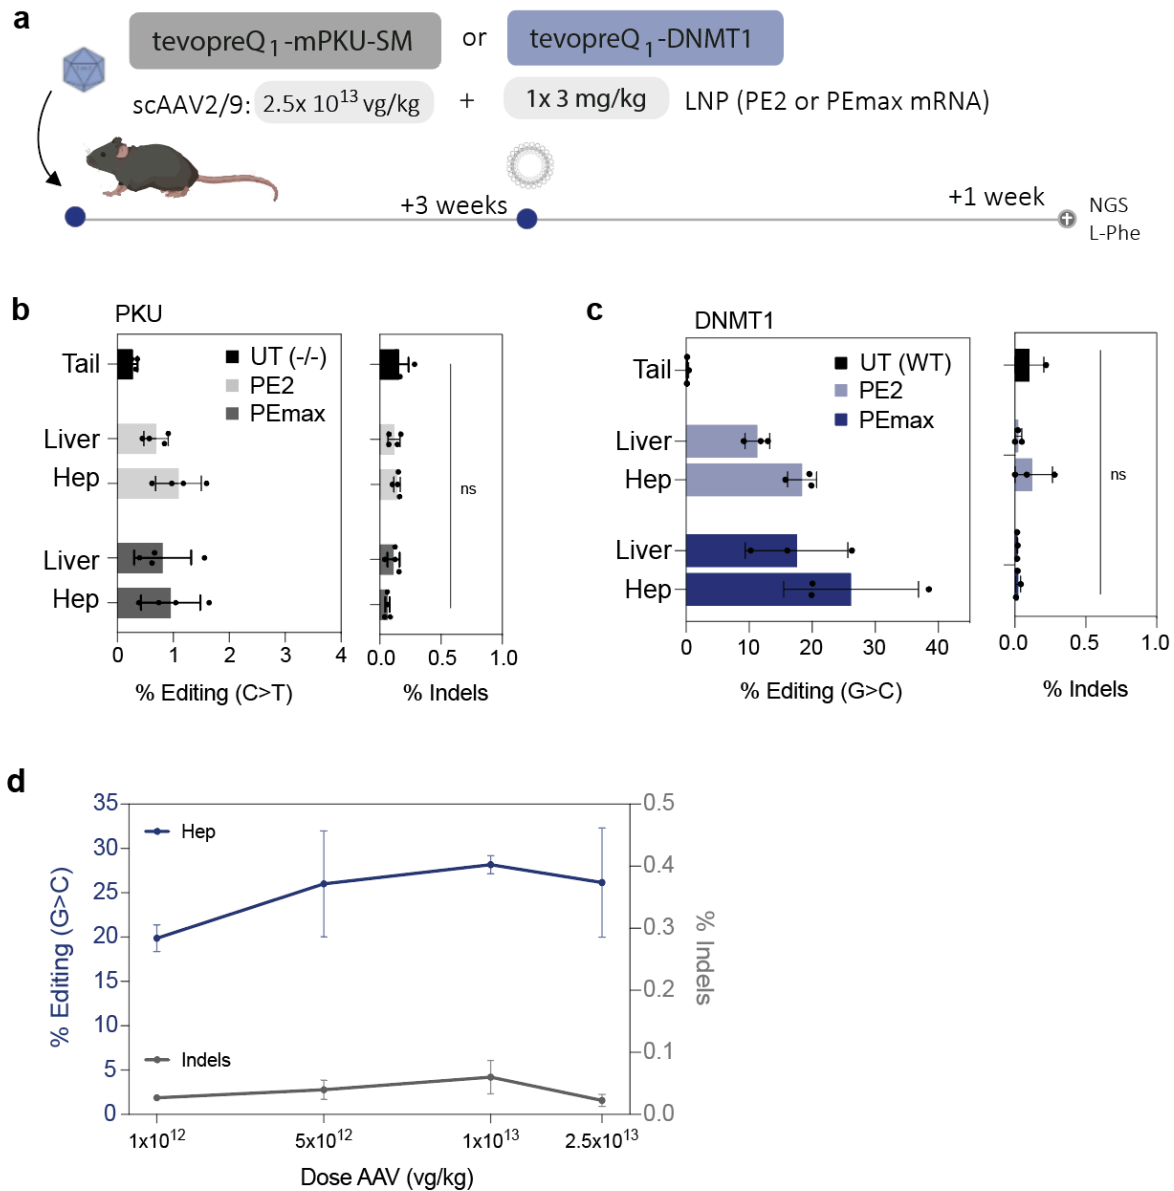

225

226

227

228

229

230

231

232

233

234

235

236

237

238

**Figure 3 | *In vivo* prime editing using AAV-pegRNA and LNP-mRNA delivery.** (a) Schematic illustration of the experimental setup. scAAV2/9 expressing the tevopreQ<sub>1</sub>-Dnmt1 pegRNA or tevopreQ<sub>1</sub>-mPKU-SM was delivered into C57BL/6J mice or *Pah<sup>enu2</sup>* mice, respectively, at a dose of 2.5x10<sup>13</sup> vg/kg. Mice were subsequently injected with LNP (one time 3 mg/kg) containing PE2 or PEmax mRNA-LNP. At the experimental endpoint, NGS was performed in isolated hepatocytes, whole liver lysates. (b) *Pah<sup>enu2</sup>* correction rates (left panel) and indel rates (right panel) of untreated tail tissue (n=5) or animals treated with a single dose of 3mg/kg PE2 (n=4) or PEmax (n=4) mRNA-LNP. (c) G-to-C editing rates (left panel) and indel rates (right panel) at the *Dnmt1* locus in untreated tail tissue (n=3) or animals treated with a single dose of 3mg/kg PE2 (n=3) or PEmax (n=3) mRNA-LNP. Values represent mean +/- s.d. of independent biological replicates and were analyzed using unpaired Student's t tests (ns, not significant, P > 0.05) (d) G-to-C editing rates (blue line, left y-axis) and indel rates (grey bar, right y-axis) of animals treated with one dose of 3 mg/kg PEmax LNP-mRNA and pre-treatment of different doses of scAAV encoding for the *Dnmt1*-targeting pegRNA. Values represent mean +/- s.e.m. of independent biological replicates.

239 Since correction rates at the *Pah<sup>enu2</sup>* locus with the dual AAV-pegRNA and LNP-mRNA  
240 approach were not sufficient to substantially reduce Phe levels, we next dosed AAV-pegRNA  
241 treated animals three times with 2 mg/kg mRNA-LNP in a 48-hour interval (**Fig 4a**).  
242 Importantly, the redosing regimen increased editing rates up to 6.2% with PE2 (average 2.9%)  
243 and up to 8.7% with PEmax (average 4.3%; **Fig. 4b**). This led to a reduction of blood L-Phe to  
244 levels below the therapeutic threshold of 600  $\mu\text{mol/L}$  (**Fig. 4c,d**), and a corresponding increase  
245 in *Pah* enzyme activity in the liver (**Fig. 4e**). Moreover, similar to the *Dnmt1* locus also at the  
246 *Pah<sup>enu2</sup>* locus editing rates did not significantly decrease when the scAAV2/9 dose was lowered  
247 from  $2.5 \times 10^{13}$  vg/kg to  $5 \times 10^{12}$  vg/kg (**Fig. S4c**).  
248  
249

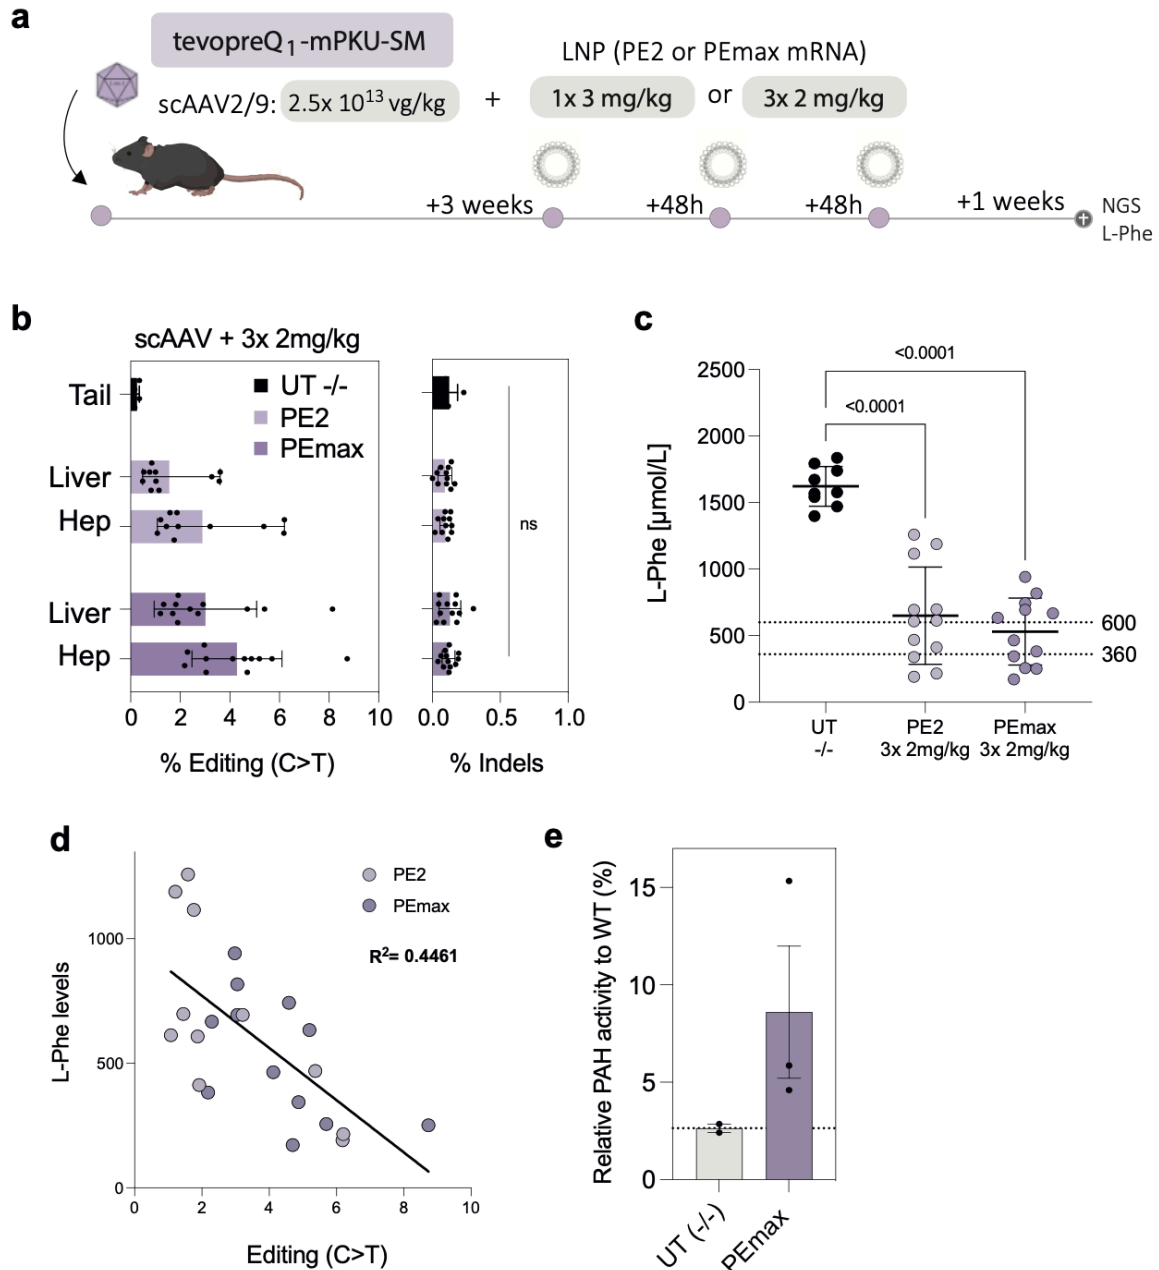

250

251 **Figure 4 | *In vivo* correction of *Pah*<sup>enu2</sup> mice using AAV-pegRNA and LNP-mRNA delivery.** (a) Schematic

252 illustration of the experimental setup. scAAV2/9 expressing the tevopreQ1-mPKU-SM pegRNA was delivered

253 into *Pah*<sup>enu2</sup> mice at a dose of 2.5x10<sup>13</sup> vg/kg, which were subsequently injected (one time 3 mg/kg or three times

254 2 mg/kg) with LNP containing PE2 or PEmax mRNA. At the experimental endpoint Phe levels were measured

255 and NGS was performed in isolated hepatocytes, whole liver lysates and lysates from other organs. (b) *Pah*<sup>enu2</sup>

256 correction rates (left panel) and indel rates (right panel) of untreated tail tissue (n=5) or animals treated with three

257 doses of 2 mg/kg PE2 (n=12) or PEmax (n=12) mRNA-LNP. (c) Phe levels at the experimental endpoint of

258 untreated homozygous *Pah*<sup>enu2</sup> animals (UT -/-; n=5), and homozygous *Pah*<sup>enu2</sup> animals dosed three times with

259 2mg/kg PE2 (n=12) or PEmax (n=12). Dashed lines indicate recommended therapeutic thresholds for L-Phe levels

260 in adults (600 μmol/L) or in children/during pregnancy (360 μmol/L)<sup>31,33</sup>. Values represent mean +/- s.e.m of

261 independent biological replicates and were analyzed using an ordinary one-way ANOVA using a Dunnett's

262 multiple comparisons test. (d) Correlation between C-to-T editing rates and Phe levels in PEmax (dark magenta)  
263 and PE2 (light magenta) treated animals at the experimental endpoints.  $R^2$ , coefficient of determination; Values  
264 represent mean  $\pm$  s.d. of independent biological replicates. (e) Enzyme activity of *Pah* in liver tissue lysates from  
265 untreated homozygous *Pah<sup>emu2</sup>* animals and homozygous *Pah<sup>emu2</sup>* animals treated with scAAV (pegRNA) and  
266 PEmax LNP-mRNA. Values are depicted as relative values to *Pah* activity in wt animals. Unless otherwise stated,  
267 values represent mean  $\pm$  s.d. of independent biological replicates and were analyzed using unpaired  
268 Student's t tests (ns, not significant,  $P > 0.05$ )

---

269

270 *In vivo prime editing using AAV-pegRNA and LNP-mRNA did not result in off-target editing*  
271 *or liver damage*

272 To assess if prime editing with AAV-pegRNA and LNP-PE mRNA delivery was limited to the  
273 liver, DNA of treated animals was isolated from other organs and analyzed by NGS. Consistent  
274 with previous mRNA-LNP biodistribution studies<sup>40</sup>, we did not observe substantial editing in  
275 any of the analyzed tissues in *Pah<sup>emu2</sup>* targeted animals treated with three doses of 2 mg/kg  
276 LNP-mRNA or *Dnmt1*-targeted animals treated with one dose of 3mg/kg LNP-mRNA (**Fig.**  
277 **5a, S5a**). Next, we assessed if editing occurred at other sites in the genome and performed  
278 targeted amplicon sequencing at the top 5 off-target binding sites of both pegRNAs, which  
279 were previously identified by CHANGE-seq<sup>19</sup> (**Fig. S2c, S5b**). Importantly, we did not observe  
280 editing above background in treated animals at any of the potential off-target sites (**Fig. 5b,c**).  
281 Finally, we examined whether delivery of LNP-mRNA or scAAV triggered liver toxicity or  
282 innate immune responses. While a slight elevation of alanine transaminase (ALT) and aspartate  
283 aminotransferase (AST) was observed between 6-28 h after administration of 2 mg/kg PEmax  
284 LNP-mRNA, levels returned to baseline levels at 45 h.p.i. (**Fig. 5d,e**). Likewise, the transient  
285 elevation of the proinflammatory cytokines Monocyte Chemoattractant Protein-1 (MCP-1),  
286 Interleukin-1 alpha (IL-1 $\alpha$ ), Interferon-gamma (IFN $\gamma$ ) and Tumor necrosis factor alpha (TNF-  
287  $\alpha$ ), which was observed at 6 h.p.i., was not detectable anymore at later timepoints (**Fig. 5f-i**).  
288 Finally, also delivery of scAAV2/9 encoding for the pegRNA at a dose of  $2.5 \times 10^{13}$  vg/kg did  
289 not induce elevated levels of ALT, AST or any of the tested proinflammatory cytokines (**Fig.**  
290 **5d-i**). In line with these observations, histological examination of the liver of treated animals  
291 did not reveal any obvious signs of tissue necrosis (**Fig. S5c**).

292

293

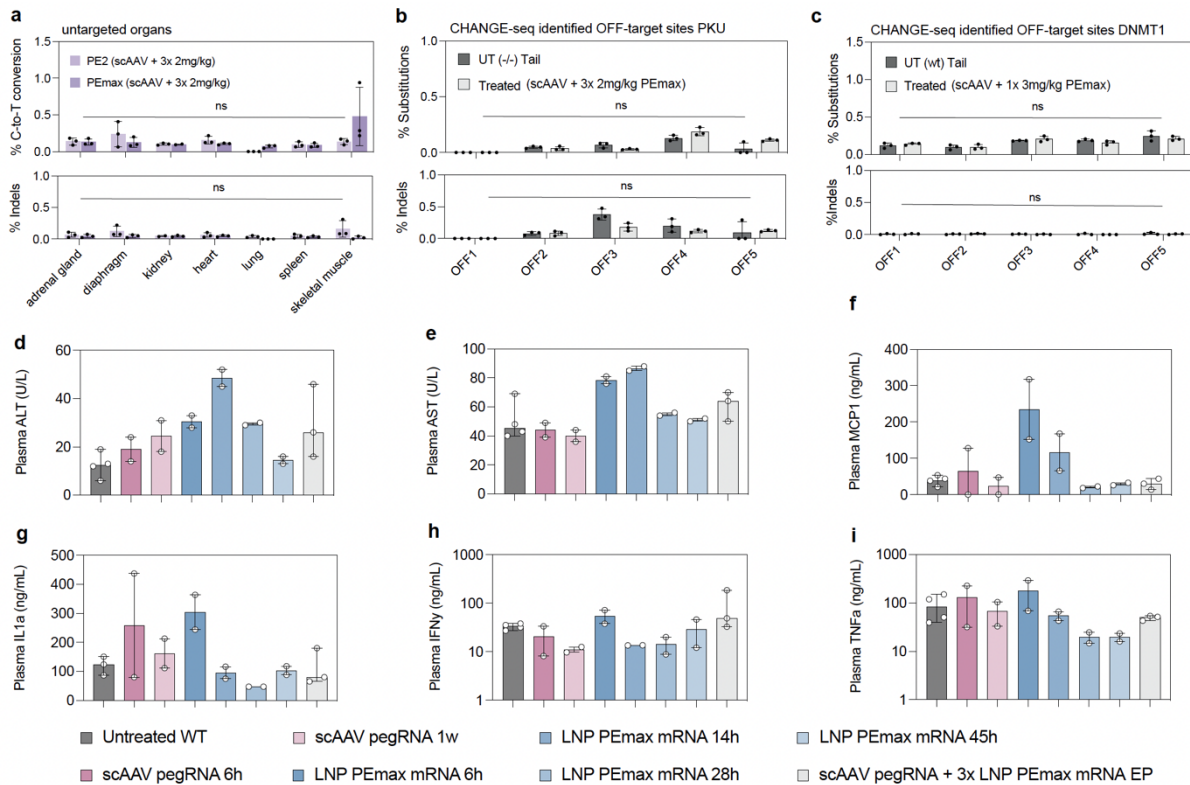

294

295 **Figure 5 | Assessment of off-target effects and liver toxicity in animals treated with AAV-pegRNA and LNP-**

296 **mRNA. (a)** C-to-T conversion rates (upper panel) and indel rates (lower panel) at the *Pah<sup>enu2</sup>* locus on DNA

297 isolated from tissues other than the liver (n=3). Animals were pre-treated with scAAV encoding for the *Pah<sup>enu2</sup>*

298 targeting pegRNA and dosed three times with 2 mg/kg PEmax. Editing rates were assessed by NGS on genomic

299 DNA isolated from whole tissue lysates. **(b)** Indel rates and substitution rates at CHANGE-seq identified off-

300 target sites for the *Pah<sup>enu2</sup>* targeting pegRNA<sup>19</sup>. Tail tissue (UT (-/-) Tail) was obtained from untreated animals

301 and hepatocytes were isolated from animals treated with 3x 2mg/kg LNP-PEmax. **(c)** Indel rates and substitution

302 rates of CHANGE-seq identified off-target site<sup>19</sup> for the *Dnmt1*-targeting pegRNA. Tail tissue was obtained from

303 untreated C57BL/6J mice (UT (wt) Tail) and hepatocytes were isolated from animals treated with 1x 3mg/kg

304 LNP-PEmax. Values represent mean +/- s.d. of three independent biological replicates. **(d-i)** Measured

305 concentration of the respective markers for liver damage or inflammation in the plasma of animals treated between

306 0-45 hours: Alanine aminotransferase (ALT) (d), aspartate aminotransferase (AST) (e), Monocyte

307 Chemoattractant Protein-1 (MCP-1) (f), Interleukin-1 alpha (IL-1 $\alpha$ ) (g), Interferon-gamma (IFN $\gamma$ ) (h) and

308 Tumor necrosis factor alpha (TNF- $\alpha$ ) (i); Values represent median +/- range of at least two independent biological

309 replicates. Means were compared using Šidák's multiple comparisons test (ns, not significant, P > 0.05).

310

311

312

313

314

315

## Discussion

Previous studies have demonstrated the feasibility of *in vivo* prime editing using AAV or AdV

delivery vectors<sup>15,16,20,24,41-45</sup>. While these studies highlight the potential of *in vivo* prime

editing for correcting genetic diseases, prolonged PE expression from viral vectors may limit

clinical application of these approaches. Similarly, previous studies achieved substantial

316 reduction of Phe levels in PKU mice by delivering a functional copy of the *Pah* gene on an  
317 AAV vector<sup>46</sup>, but since AAV vectors remain episomal and hepatocytes divide approximately  
318 once every year<sup>47</sup> it is unlikely that this approach could result in a lifelong cure of patients.  
319 Here, we developed an *in vivo* prime editing approach where only the pegRNA is delivered via  
320 AAV and the PE is delivered as LNP-mRNA. This approach led to transient PE expression in  
321 the liver, which resulted in 26% editing at the *Dnmt1* locus using a single dose of 3 mg/kg  
322 LNP-mRNA and 4.6% editing at the *Pah<sup>enu2</sup>* locus using three doses of 2mg/kg LNP-mRNA.  
323 Importantly, *Pah<sup>enu2</sup>* correction rates were sufficient to reduce Phe levels below 600  $\mu\text{mol/l}$ ,  
324 which is considered therapeutic for adult PKU patients. In line with the high specificity of  
325 prime editing described in previous studies<sup>48</sup>, we did not detect editing at experimentally  
326 validated off-target binding sites with both pegRNAs. Furthermore, hepatotropism of LNPs  
327 and AAV2/9 ensured that editing was largely restricted to hepatocytes.  
328 The efficiency of prime editing is influenced by the sequence of the pegRNA and the target  
329 site, making it challenging to address all pathogenic PKU mutations effectively. However,  
330 transient PE expression using LNP-mediated mRNA delivery could prove to be a valuable  
331 strategy for treating certain patients with PKU or other genetic liver disorders.

332

## 333 **Materials and Methods**

334

### 335 **Generation of plasmids**

336 To generate epegRNA plasmids, annealed spacer, scaffold, and 3' extension oligos were cloned  
337 into pU6-tevopreq1-GG-acceptor (Addgene No.174038) by Golden Gate Assembly as  
338 previously described<sup>14</sup>. For the generation of split-intein PEmax constructs, inserts were PCR  
339 amplified from the epegRNA plasmids and from pCMV-PEmax (Addgene No. 174820) and  
340 inserted into the respective backbones (Addgene No. 187181 and 117182) using HiFi DNA  
341 Assembly Master Mix [New England Biolabs (NEB)]. To generate PiggyBac PKU reporter  
342 plasmids, inserts with homology overhangs for cloning were ordered from IDT and cloned into  
343 the pPB-Zeocin backbone using HiFi DNA Assembly Master Mix (NEB). All PCRs were  
344 performed using Q5 High-Fidelity DNA Polymerase (NEB).

345

### 346 **Cell culture transfection and genomic DNA preparation**

347 HEK293T [American Type Culture Collection (ATCC): CRL-3216] and K562 (ATCC: CCL-  
348 243) cells were maintained in Dulbecco's modified Eagle's medium (DMEM) plus GlutaMAX  
349 (Thermo Fisher Scientific) or Roswell Park Memorial Institute (RPMI) 1640 Medium (Thermo



350 Fisher Scientific), respectively and supplemented with 10% (v/v) fetal bovine serum (FBS) and  
351 1% penicillin/streptomycin (Thermo Fisher Scientific) at 37°C and 5% CO<sub>2</sub>. Cells were  
352 maintained at confluency below 90% (HEK293T) or below a density of 1.8 Mio. cells per  
353 milliliter (K562) and seeded into 48-well cell culture plates (Greiner). About 0.1 Mio. cells  
354 were transfected using 1.5 µl of Lipofectamine 2000 (Thermo Fisher Scientific) with 375 ng  
355 of PEmax and 125 ng of epegRNA or 250 ng of each AAV construct according to the  
356 manufacturer's instructions. Unless otherwise noted, cells were incubated for 3 days, and  
357 genomic DNA was isolated by direct lysis. For nucleofections 0.5 pmol of the PEmax mRNA  
358 were used in a 1:1 molar ratio with the pegRNAs. Nucleofections of mRNA were carried out  
359 with one pulse of 1400 mV and 20 ms pulse width. After nucleofection, cells were cultured in  
360 200 µL of DMEM plus GlutaMAX for 48 hours prior to isolation of genomic DNA by direct  
361 lysis. In vitro transcription of the unmodified pegRNA was carried out as previously described  
362 on a synthetic DNA fragment (Table S4)<sup>49</sup>.

363

#### 364 **Generation of reporter cells by PiggyBac transposon**

365 For generation of the PKU reporter cell lines with the PiggyBac transposon, 75'000 HEK293T  
366 or K562 cells were seeded into a 24-well culture plate (Greiner) and transfected the next day  
367 using Lipofectamine 2000 (Thermo Fisher Scientific) according to the manufacturer's  
368 instructions. Briefly, 1.5 µl of Lipofectamine was mixed with 23.5 µl of Opti-MEM, incubated  
369 at room temperature for 10 min, and added to 225 ng of transposon plasmid and 25 ng of  
370 transposon helper plasmid (filled up to 25 µl of Opti-MEM). After 30 min of incubation at RT,  
371 cells were transfected. Three days after transfection, cells were enriched for 10 days using  
372 Zeocin (InvivoGen, 150 µg/ml).

373

#### 374 **AAV production**

375 Pseudotyped AAV9 vectors (AAV2/9) were produced by co-transfection of packaging (see  
376 above), capsid and helper plasmids (Addgene No. 112865 and 112867) were incubated for five  
377 days until harvest and precipitation using PEG and NaCl. The AAVs were further purified  
378 using a gradient centrifugation with OptiPrep (Sigma-Aldrich) as previously described<sup>50</sup> and  
379 subsequently concentrated using Vivaspin® 20 centrifugal concentrators (VWR). Physical  
380 titers (vector genomes mL<sup>-1</sup>) were determined using a Qubit 3.0 Fluorometer. In brief, the  
381 Qubit Fluorometer 3.0 (Life Technologies) was used to measure the concentrations (ng/mL) of  
382 the extracted genomes by denaturation at 95°C for 5 min, after which the readings were  
383 converted to vector genomes per mL using the genome's molecular mass and Avogadro's

384 constant. Identity of the packaged genomes of each AAV vector was confirmed by Sanger  
385 DNA sequencing by Mycosynth AG (Balgach, Switzerland), testing 500 ng of denatured AAV  
386 using an AAV-genome-specific sequencing primer. AAV2/9 viruses were stored at  $-80^{\circ}\text{C}$  until  
387 use and diluted with phosphate-buffered saline (PBS, Thermo Fisher Scientific) if necessary.

388

### 389 **RNA synthesis and LNP encapsulation**

390 mRNA was produced as previously described<sup>51</sup>. In short, the coding sequence of PE2 and  
391 PEmax were cloned into the mRNA production plasmid using HiFi DNA Assembly Master  
392 Mix (NEB). mRNAs were transcribed to contain 101 nucleotide-long poly(A) tails. m<sup>1</sup>Ψ-5'-  
393 triphosphate (TriLink) instead of UTP was used to generate modified nucleoside-containing  
394 mRNA. Capping of the *in vitro* transcribed mRNAs was performed co-transcriptionally using  
395 the trinucleotide cap1 analog, CleanCap (TriLink). mRNA was purified by cellulose (Sigma-  
396 Aldrich) purification as described<sup>52</sup>. All mRNAs were analyzed by agarose gel electrophoresis  
397 and were stored frozen at  $-20^{\circ}\text{C}$ . Synthetic pegRNAs were ordered and synthesized by  
398 Axolabs (peg-mod\_1) or Agilent (peg-mod\_2-4). LNP were formulated as described  
399 previously<sup>53</sup>. In short, an ethanolic solution of 1,2-distearoyl-*sn*-glycero-3-phosphocholine,  
400 cholesterol, a PEG lipid and an ionizable cationic lipid was rapidly mixed with an aqueous  
401 solution (pH 4) containing prime editor mRNA using an in-line mixer. The lipid and the LNP  
402 used in this study are described in patent application WO 2017/004143. The resulting LNP  
403 formulation was dialyzed overnight against  $1\times$  PBS, 0.2- $\mu\text{m}$  sterile filtered and stored at  $-80^{\circ}\text{C}$   
404 at a concentration of  $1\ \mu\text{g}/\mu\text{l}$  of total RNA. Encapsulation efficiencies of mRNA in the LNP  
405 were  $>97\%$  as measured by the Quant-iT Ribogreen Assay (Life Technologies) and LNP sizes  
406 were below 80 nm as measured by a Malvern Zetasizer (Malvern Panalytical).

### 407 **Animal studies**

408 Animal experiments were performed in accordance with protocols approved by the Kantonales  
409 Veterinäramt Zürich and in compliance with all relevant ethical regulations. *Pah<sup>emu2</sup>* and  
410 C57BL/6J mice were housed in a pathogen-free animal facility at the Institute of Pharmacology  
411 and Toxicology of the University of Zurich. Mice were kept in a temperature- and humidity-  
412 controlled room on a 12-hour light-dark cycle. Mice were fed a standard laboratory chow  
413 (Kliba Nafag no. 3437 with 18.5% crude protein) and genotyped at weaning.  
414 Heterozygous *Pah<sup>emu2</sup>* littermates were used as controls for physiological L-Phe concentrations  
415 in the blood ( $<120\ \mu\text{mol}/\text{L}$ ). For sampling of blood for L-Phe determination, mice were fasted

416 for 3 to 4 hours, and the blood was collected from the tail vein. Adult mice were injected with  
417  $5\text{-}10 \times 10^{13}$  vg/kg (AAV) or with 1 – 3 mg/kg (LNP) in a maximal volume of 150  $\mu\text{l}$  via the  
418 tail vein. The selected AAV and LNP doses were based on the maximum injection volume for  
419 adults (150  $\mu\text{l}$  of undiluted viral vectors via the tail vein).

#### 420 **Primary hepatocyte isolation**

421 Primary hepatocytes were isolated using a two-step perfusion method. Briefly, pre-perfusion  
422 with Hanks' buffer (supplemented with 0.5 mM EDTA and 25 mM Hepes) was performed by  
423 inserting the cannula through the superior vena cava and cutting the portal vein. Next, livers  
424 were perfused at low flow for about 10 min with digestion buffer (low-glucose DMEM  
425 supplemented with 1 mM Hepes) containing freshly added Liberase (32  $\mu\text{g}/\text{ml}$ ; Roche).  
426 Digestion was stopped using isolation buffer (low-glucose DMEM supplemented with 10%  
427 FBS), and cells were separated from the matrix by gently pushing with a cell scraper. The cell  
428 suspension was filtered through a 100- $\mu\text{m}$  filter (Corning), and hepatocytes were purified by  
429 two low-speed centrifugation steps (50g for 2 min).

#### 430 **PCR amplification for deep sequencing**

431 Genomic DNA from mouse tissues were isolated by direct lysis. Locus-specific primers were  
432 used to generate targeted amplicons for deep sequencing. First, input genomic DNA was  
433 amplified in a 10- $\mu\text{l}$  reaction for 26 cycles using NEBNext High-Fidelity 2x PCR Master Mix  
434 (NEB). PCR products were purified using Sera-Mag magnetic beads (Cytiva) and subsequently  
435 amplified for six cycles using primers with sequencing adapters. Approximately equal amounts  
436 of PCR products from each sample were pooled, gel purified, and quantified using a Qubit 3.0  
437 fluorometer and the dsDNA HS Assay Kit (Thermo Fisher Scientific). Paired-end sequencing  
438 of purified libraries was performed on an Illumina MiSeq.

439

#### 440 **NGS data analysis**

441 Sequencing reads were demultiplexed using MiSeq Reporter (Illumina). Amplicon sequences  
442 were aligned to their reference sequences using CRISPResso2<sup>54</sup>. Prime editing efficiencies  
443 were calculated as percentage of (number of reads containing only the desired edit)/(number  
444 of total reads). Indel yields were calculated as percentage of (number of indel-containing  
445 reads)/(total reads).

446

#### 447 **Quantification of phenylalanine in the blood**

448 Amino acids were extracted from a 3.2-mm dried blood sample using the Neomass AAAC Plus  
449 newborn screening kit (Labsystems Diagnostics). A UHPLC (ultrahigh performance liquid  
450 chromatography) Nexera X2 coupled to an LCMS-8060 triple quadrupole mass spectrometer  
451 with electrospray ionization (Shimadzu) was used for the quantitative analysis of  
452 phenylalanine. LabSolutions and Neonatal Solution software (Shimadzu) were used for data  
453 acquisition and data analysis.

454

#### 455 **Quantification of phenylalanine enzyme activity**

456 Whole liver extracts were analyzed using isotope-dilution liquid chromatography-electrospray  
457 ionization tandem mass spectrometry (LC-ESI-MS/MS) as described previously<sup>55</sup>.

458

#### 459 **Western blot**

460 Proteins were isolated from liver samples of treated and untreated animals. Briefly, cells were  
461 lysed in RIPA buffer, supplemented with protease inhibitors (Sigma-Aldrich). Protein amounts  
462 were determined using the Pierce BCA Protein Assay Kit (Thermo Fisher). Equal amounts of  
463 protein (80 µg) were separated by SDS-PAGE (Thermo Fisher) and transferred to a 0.45 µm  
464 nitrocellulose membrane (Amersham). Membranes were incubated with mouse anti-Cas9  
465 (1:1'000; Cat. No. #14697T; Cell Signaling) and rabbit anti-GAPDH (1:10'000; Cat. No.  
466 ab181602; abcam). Signals were detected by fluorescence using IRDye-conjugated secondary  
467 antibodies (Licor).

468

#### 469 **RNA isolation and RT-qPCR**

470 RNA was isolated from shock frozen liver samples using the RNeasy Mini kit (Qiagen)  
471 according to the manufacturer's instructions. RNA was reverse transcribed to cDNA using  
472 random primers and GoScript Reverse Transcriptase kit (Promega). RT-qPCR was performed  
473 using Firepol qPCR Master Mix (Solis BioDyne) and analyzed by 7900HT Fast Real-Time  
474 PCR System (Applied Biosystems). Fold changes were calculated using the delta Ct method.  
475 Used primers are listed in Table S3.

476

#### 477 **Immunofluorescence**

478 During liver perfusion, one liver lobe was tightened off using a silk suture thread (Fine Science  
479 Tools, FST). Tissues were transferred to a 30% sucrose solution overnight at 4 °C and  
480 embedded in OCT compound in cryomolds (Tissue-Tek) and frozen at -80°C for at least 30

481 minutes. Frozen tissues were sectioned at 7  $\mu\text{m}$  at  $-20^\circ\text{C}$ , and mounted directly on Superfrost  
482 Plus slides (Thermo Fisher Scientific). Cryosections were counterstained with DAPI (Thermo  
483 Fisher Scientific) and mounted in VECTASHIELD mounting medium (Vector Labs). Two  
484 frozen sections were analyzed per mouse per tissue. Mouse tissue was imaged using Zeiss  
485 AxioScope and Colibri 7 LED Illumination lighting system. Imaging conditions and intensity  
486 scales were matched for all images. Images were taken using Zeiss software Zen2 and analyzed  
487 by Fiji ImageJ software (v1.51n)<sup>56</sup>.

488

## 489 **Histology**

490 Livers were fixed using 4% paraformaldehyde (PFA, Sigma-Aldrich), followed by ethanol  
491 dehydration and paraffinization. Paraffin blocks were cut into 5  $\mu\text{m}$  thick sections,  
492 deparaffinized with xylene, and rehydrated. Sections were HE-stained and examined for  
493 histopathological changes.

494

## 495 **Detection of plasma pro-inflammatory and damage markers**

496 Blood was collected from the inferior vena cava using Lithium-Heparin coated 0.5 ml tubes  
497 (MiniCollect) prior to liver perfusion. Samples were centrifuged at 2000xg for 10 min and the  
498 supernatant was collected and stored at  $-20^\circ\text{C}$  until measurement. AST and ALT levels from  
499 all mouse samples were measured as routine parameters at the Division of Clinical Chemistry  
500 and Biochemistry at the University Children's Hospital Zurich using Alinity ci-series. Pro-  
501 inflammatory cytokines were detected using LEGENDplex Mouse Inflammation panel (13-  
502 plex; Biogend; catalog number 740446; lot number B354399), a bead-based multiplex assay,  
503 according to the manufacturer's instructions.

504

## 505 **Statistical analysis**

506 Statistical analyses were performed using GraphPad Prism 9.0.0 for macOS. Data are  
507 represented as biological replicates and are depicted as means  $\pm$  standard deviation (s.d.) or  
508 standard error of the mean (s.e.m.) as indicated in the corresponding figure legends. Likewise,  
509 sample sizes and the statistical tests used are described in detail in the respective figure legends.  
510 For all analyses,  $P < 0.05$  was considered statistically significant.

511

## 512 **Acknowledgments**

513 We thank the Functional Genomics Center Zurich for technical support and access to  
514 instruments at the University of Zurich and ETH Zürich, and members of the Thöny, Häberle

515 and Schwank labs for discussions. We thank the viral vector facility (VVF) Zurich for scientific  
516 advice and providing plasmids containing ssAAV2 and scAAV2 genomes. pU6-tevopreq1-  
517 GG-acceptor (Addgene No.174038) and pCMV-PEmax (Addgene No. 174820) were gifts  
518 from D. Liu and AAV capsid and helper plasmids (Addgene No. 112865 and 112867) were  
519 gifts from J.M. Wilson. We thank Daniel Ryan and the whole Agilent team for providing  
520 PACE-modified synthetic pegRNAs. This study was supported by the Swiss National Science  
521 Foundation (SNSF) grant no. 310030\_185293 (to G.S.), the SERI funded ERC-CoG  
522 ‘GeneRepair’ (to G.S), SNSF Sinergia grant no. 180257 (to B.T.), Novartis Foundation for  
523 Medical-Biological Research no. FN20-0000000203 (to D.B.), SNSF Spark fellowship no.  
524 196287 (to D.B.), the University Research Priority Programs ‘ITINERARE’ (to D.B and G.S)  
525 and ‘Human Reproduction Reloaded’ (G.S. and E.I), the Promedica Foundation (to G.S.) and  
526 the University Zürich Candoc grant no. FK-22-033 (to T.R.).

527

#### 528 **Author contributions:**

529 T.R. and G.S. designed the study. T.R., E.I, A.T. and L.V. performed and/or analyzed *in*  
530 *vivo* experiments. T.R., Y.W., D.B., E.V. and E.I. performed and analyzed *in*  
531 *vitro* experiments. N.R. and E.F. performed blood Phe and *Pah* measurements. C.S. performed  
532 genotyping experiments. L.S., K.F.M., T.R., Y.W. and D.B. performed molecular cloning  
533 experiments. D.B performed western blotting analysis. N.P., H.M. and M.V. performed *in vitro*  
534 transcription of mRNA. Y.K.T., P.J.C.L., J.M. and S.H.Y.F. developed LNP formulations and  
535 complexed mRNAs with LNP. M.M performed measurements for toxicity and  
536 proinflammatory markers. A.C. performed AST and ALT measurements. B.T., M.K. and J.H.  
537 provided technical and conceptual advice. T.R. prepared figures. T.R. and G.S. wrote the  
538 manuscript. All authors reviewed the manuscript.

539

#### 540 **Competing interests:**

541 Y.K.T., P.J.C.L. and S.H.Y.F. are employees of Acuitas Therapeutics. G.S. is a scientific  
542 advisor of Prime Medicine.

543

544 **Data availability:** All data associated with this study are present in the paper or the  
545 Supplementary Materials. Illumina sequencing data are available in the Sequence Read  
546 Archive (SRA) under the accession number PRJNA947564.

547

#### 548 **Supplementary Material**

549 **Figure S1)** *In vitro* optimization of PE components for correction of the disease-causing T-to-  
550 C mutation at the *Pah<sup>emu</sup>* locus.

551 **Figure S2)** *In vivo* prime editing using AAV-mediated PE delivery in PKU mice.

552 **Figure S3)** Expression kinetics of the PE after LNP-mRNA delivery into the liver.

553 **Figure S4)** *In vivo* prime editing rates in mice treated with AAV-pegRNA and LNP-mRNA.

554 **Figure S5)** Editing rates in non-liver tissues and liver histology at different timepoints after  
555 LNP-mRNA delivery.

556 **Figure S6)** Gating strategy identifying proinflammatory markers.

557 **Note 1)** Amino acid sequences of AAV vectors used in this study.

558 **Note 2)** Complete image of Western blot.

559 **Table 1)** pegRNA designs tested for correction of the *Pah<sup>emu2</sup>* disease locus.

560 **Table 2)** Oligonucleotides used for this study.

561 **Table 3)** Oligonucleotides used for RT-qPCR.

562 **Table 4)** modified pegRNAs used in this study.

563

## 564 **References**

- 565 1. Blau, N., Van Spronsen, F. J. & Levy, H. L. Phenylketonuria. *The Lancet* **376**,  
566 1417–1427 (2010).
- 567 2. Mitchell, J. J., Trakadis, Y. J. & Scriver, C. R. Phenylalanine hydroxylase  
568 deficiency. *Genetics in Medicine* **13**, 607–617 (2011).
- 569 3. Scriver, C. R. & Clow, C. L. Phenylketonuria: Epitome of Human Biochemical  
570 Genetics. <http://dx.doi.org/10.1056/NEJM198012113032404> **303**, 1394–1400  
571 (2009).
- 572 4. Hydere, T. & Coppentrath, V. A. A Comprehensive Review of Pegvaliase, an  
573 Enzyme Substitution Therapy for the Treatment of Phenylketonuria.  
574 <https://doi.org/10.1177/1177392819857089> **13**, (2019).
- 575 5. Martinez, M., Harding, C. O., Schwank, G. & Thöny, B. State-of-the-Art 2023  
576 on Gene Therapy for Phenylketonuria. *J Inherit Metab Dis* (2023)  
577 doi:10.1002/JIMD.12651.
- 578 6. Shedlovsky, A., McDonald, J. D., Symula, D. & Dove, W. F. Mouse models of  
579 human phenylketonuria. *Genetics* **134**, 1205–1210 (1993).
- 580 7. Villiger, L. *et al.* Treatment of a metabolic liver disease by *in vivo* genome base  
581 editing in adult mice. *Nat Med* **24**, 1519–1525 (2018).
- 582 8. Richards, D. Y. *et al.* AAV-Mediated CRISPR/Cas9 Gene Editing in Murine  
583 Phenylketonuria. *Mol Ther Methods Clin Dev* **17**, 234–245 (2019).
- 584 9. Villiger, L. *et al.* Treatment of a metabolic liver disease by *in vivo* genome base  
585 editing in adult mice. *Nat Med* **24**, 1519–1525 (2018).
- 586 10. Villiger, L. *et al.* *In vivo* cytidine base editing of hepatocytes without detectable  
587 off-target mutations in RNA and DNA. *Nat Biomed Eng* **5**, 179–189 (2021).
- 588 11. Brooks, D. L. *et al.* Rapid and definitive treatment of phenylketonuria in  
589 variant-humanized mice with corrective editing. *Nature Communications* 2023  
590 *14:1* **14**, 1–9 (2023).

- 591 12. Zhou, L. *et al.* A universal strategy for AAV delivery of base editors to correct  
592 genetic point mutations in neonatal PKU mice. *Mol Ther Methods Clin Dev* **24**,  
593 230–240 (2022).
- 594 13. Brooks, D. L. *et al.* A base editing strategy using mRNA-LNPs for in vivo  
595 correction of the most frequent phenylketonuria variant. *HGG Adv* (2023)  
596 doi:10.1016/J.XHGG.2023.100253.
- 597 14. Anzalone, A. V. *et al.* Search-and-replace genome editing without double-strand  
598 breaks or donor DNA. *Nature* (2019) doi:10.1038/s41586-019-1711-4.
- 599 15. Zheng, C. *et al.* A flexible split prime editor using truncated reverse  
600 transcriptase improves dual-AAV delivery in mouse liver. *Mol Ther* **30**, 1343–  
601 1351 (2022).
- 602 16. Zhi, S. *et al.* Dual-AAV delivering split prime editor system for in vivo genome  
603 editing. *Molecular Therapy* **30**, 283–294 (2022).
- 604 17. Newby, G. A. & Liu, D. R. In vivo somatic cell base editing and prime editing.  
605 *Mol Ther* **29**, 3107–3124 (2021).
- 606 18. Wold, W. S. M. & Toth, K. Adenovirus vectors for gene therapy, vaccination  
607 and cancer gene therapy. *Curr Gene Ther* **13**, 421–433 (2013).
- 608 19. Böck, D. *et al.* In vivo prime editing of a metabolic liver disease in mice. *Sci*  
609 *Transl Med* **14**, 9238 (2022).
- 610 20. Brooks, D. L. *et al.* Efficient in vivo prime editing corrects the most frequent  
611 phenylketonuria variant, associated with high unmet medical need. *Am J Hum*  
612 *Genet* **110**, 2003–2014 (2023).
- 613 21. Chen, P. J. *et al.* Enhanced prime editing systems by manipulating cellular  
614 determinants of editing outcomes. *Cell* **184**, (2021).
- 615 22. Nelson, J. W. *et al.* Engineered pegRNAs improve prime editing efficiency. *Nat*  
616 *Biotechnol* (2021) doi:10.1038/s41587-021-01039-7.
- 617 23. Mathis, N. *et al.* Predicting prime editing efficiency and product purity by deep  
618 learning. *Nat Biotechnol* (2023) doi:10.1038/s41587-022-01613-7.
- 619 24. Böck, D. *et al.* In vivo prime editing of a metabolic liver disease in mice. *Sci*  
620 *Transl Med* **14**, (2022).
- 621 25. Viecelli, H. M. *et al.* Treatment of phenylketonuria using minicircle-based  
622 naked-DNA gene transfer to murine liver. *Hepatology* **60**, 1035–1043 (2014).
- 623 26. Choi, J. H. *et al.* Optimization of AAV expression cassettes to improve  
624 packaging capacity and transgene expression in neurons. *Mol Brain* **7**, 17  
625 (2014).
- 626 27. Rothgangl, T. *et al.* In vivo adenine base editing of PCSK9 in macaques reduces  
627 LDL cholesterol levels. *Nat Biotechnol* (2021) doi:10.1038/s41587-021-00933-  
628 4.
- 629 28. van Wegberg, A. M. J. J. *et al.* The complete European guidelines on  
630 phenylketonuria: diagnosis and treatment. *Orphanet J Rare Dis* **12**, 1–56  
631 (2017).
- 632 29. Vockley, J. *et al.* Phenylalanine hydroxylase deficiency: diagnosis and  
633 management guideline. *Genetics in Medicine* **2014 16:2** **16**, 188–200 (2013).
- 634 30. Lek, A. *et al.* Death after High-Dose rAAV9 Gene Therapy in a Patient with  
635 Duchenne’s Muscular Dystrophy. *N Engl J Med* **389**, 1203–1210 (2023).
- 636 31. Philippidis, A. Novartis confirms deaths of two patients treated with gene  
637 therapy Zolgensma. *Hum Gene Ther* **33**, 842–844 (2022).
- 638 32. Musunuru, K. *et al.* In vivo CRISPR base editing of PCSK9 durably lowers  
639 cholesterol in primates. *Nature* **593**, (2021).



- 640 33. Villiger, L. *et al.* In vivo cytidine base editing of hepatocytes without detectable  
641 off-target mutations in RNA and DNA. *Nat Biomed Eng* **5**, 179–189 (2021).
- 642 34. Finn, J. D. *et al.* A Single Administration of CRISPR/Cas9 Lipid Nanoparticles  
643 Achieves Robust and Persistent In Vivo Genome Editing. *Cell Rep* **22**, (2018).
- 644 35. Yin, H. *et al.* structure-guided chemical modification of guide RNA enables  
645 potent non-viral in vivo genome editing. *Nat Biotechnol* **35**, 1179–1187 (2017).
- 646 36. Kenjo, E. *et al.* Low immunogenicity of LNP allows repeated administrations of  
647 CRISPR-Cas9 mRNA into skeletal muscle in mice. *Nature Communications*  
648 *2021 12:1* **12**, 1–13 (2021).
- 649 37. Pardi, N., Hogan, M. J., Porter, F. W. & Weissman, D. mRNA vaccines — a  
650 new era in vaccinology. *Nature Reviews Drug Discovery* *2018 17:4* **17**, 261–  
651 279 (2018).
- 652 38. Andries, O. *et al.* N1-methylpseudouridine-incorporated mRNA outperforms  
653 pseudouridine-incorporated mRNA by providing enhanced protein expression  
654 and reduced immunogenicity in mammalian cell lines and mice. *Journal of*  
655 *Controlled Release* **217**, 337–344 (2015).
- 656 39. Ryan, D. E. *et al.* Phosphonoacetate Modifications Enhance the Stability and  
657 Editing Yields of Guide RNAs for Cas9 Editors. *Biochemistry* (2021)  
658 doi:10.1021/ACS.BIOCHEM.1C00768/ASSET/IMAGES/LARGE/BI1C00768  
659 \_0003.JPEG.
- 660 40. Witzigmann, D. *et al.* Lipid nanoparticle technology for therapeutic gene  
661 regulation in the liver. *Adv Drug Deliv Rev* **159**, 344–363 (2020).
- 662 41. Li, C. *et al.* In vivo HSC prime editing rescues Sickle Cell Disease in a mouse  
663 model. *Blood* **17:blood.2**, (2023).
- 664 42. She, K. *et al.* Dual-AAV split prime editor corrects the mutation and phenotype  
665 in mice with inherited retinal degeneration. *Signal Transduction and Targeted*  
666 *Therapy* *2022 8:1* **8**, 1–12 (2023).
- 667 43. Gao, Z. *et al.* A truncated reverse transcriptase enhances prime editing by split  
668 AAV vectors. *Mol Ther* **30**, 2942–2951 (2022).
- 669 44. Liu, P. *et al.* Improved prime editors enable pathogenic allele correction and  
670 cancer modelling in adult mice. *Nature Communications* *2021 12:1* **12**, 1–13  
671 (2021).
- 672 45. Davis, J. R. *et al.* Efficient prime editing in mouse brain, liver and heart with  
673 dual AAVs. *Nature Biotechnology* *2023 1–12* (2023) doi:10.1038/s41587-023-  
674 01758-z.
- 675 46. Kaiser, R. A. *et al.* Use of an adeno-associated virus serotype Anc80 to provide  
676 durable cure of phenylketonuria in a mouse model. *J Inherit Metab Dis* **44**,  
677 1369–1381 (2021).
- 678 47. Duncan, A. W., Dorrell, C. & Grompe, M. Stem Cells and Liver Regeneration.  
679 *Gastroenterology* **137**, 466 (2009).
- 680 48. Liang, S. Q. *et al.* Genome-wide profiling of prime editor off-target sites in vitro  
681 and in vivo using PE-tag. *Nature Methods* *2023 20:6* **20**, 898–907 (2023).
- 682 49. Walton, R. T., Hsu, J. Y., Joung, J. K. & Kleinstiver, B. P. Scalable  
683 characterization of the PAM requirements of CRISPR–Cas enzymes using HT-  
684 PAMDA. *Nature Protocols* *2021 16:3* **16**, 1511–1547 (2021).
- 685 50. Grieger, J. C. & Samulski, R. J. Packaging Capacity of Adeno-Associated Virus  
686 Serotypes: Impact of Larger Genomes on Infectivity and Postentry Steps. *J*  
687 *Virol* **79**, 9933 (2005).

- 688 51. van de Ven, K. *et al.* A universal influenza mRNA vaccine candidate boosts T  
689 cell responses and reduces zoonotic influenza virus disease in ferrets. *Sci Adv* **8**,  
690 (2022).
- 691 52. Baiersdörfer, M. *et al.* A Facile Method for the Removal of dsRNA  
692 Contaminant from In Vitro-Transcribed mRNA. *Mol Ther Nucleic Acids* (2019)  
693 doi:10.1016/j.omtn.2019.02.018.
- 694 53. Conway, A. *et al.* Non-viral Delivery of Zinc Finger Nuclease mRNA Enables  
695 Highly Efficient In Vivo Genome Editing of Multiple Therapeutic Gene  
696 Targets. *Molecular Therapy* **27**, 866–877 (2019).
- 697 54. Clement, K. *et al.* CRISPResso2 provides accurate and rapid genome editing  
698 sequence analysis. *Nature Biotechnology* vol. 37 224–226 Preprint at  
699 <https://doi.org/10.1038/s41587-019-0032-3> (2019).
- 700 55. Heintz, C., Troxler, H., Martinez, A., Thöny, B. & Blau, N. Quantification of  
701 phenylalanine hydroxylase activity by isotope-dilution liquid chromatography-  
702 electrospray ionization tandem mass spectrometry. *Mol Genet Metab* **105**, 559–  
703 565 (2012).
- 704 56. Schindelin, J. *et al.* Fiji: An open-source platform for biological-image analysis.  
705 *Nature Methods* Preprint at <https://doi.org/10.1038/nmeth.2019> (2012).  
706
